# Supplementary material for: Three rounds (1R/2R/3R) of genome duplications and the evolution of the glycolytic pathway in vertebrates
Source: PubMed Central journal article supplement (PMC1508162; doi:10.1186/1741-7007-4-16), 2006-06-06
Supplement: 1741-7007-4-16-S1.pdf [file 1741-7007-4-16-S1.pdf]

**Supplementary material:** GenBank, JGI, ENSEMBL accession numbers of the amino acid sequences used for the phylogenetic analyses.

| Hexokinase (HK)               |                                                                                                    | Phosphoglucose isomerase (PGI) |                                        | Phosphofructokinase (PFK)     |                                                                                                                                            |
|-------------------------------|----------------------------------------------------------------------------------------------------|--------------------------------|----------------------------------------|-------------------------------|--------------------------------------------------------------------------------------------------------------------------------------------|
| <i>Homo sapiens</i>           | P19367, P52789, P52790, P35557                                                                     | <i>Homo sapiens</i>            | AAH04982                               | <i>Homo sapiens</i>           | P16118, O60825, Q16877, Q01813                                                                                                             |
| <i>Mus musculus</i>           | P17710, O08528, XP_127381, P52792                                                                  | <i>Mus musculus</i>            | AAH88995                               | <i>Mus musculus</i>           | AAH57594, Q7TS91, P70265, XP_284750                                                                                                        |
| <i>Gallus gallus</i>          | NP_989432, NP_989543, AAM83106                                                                     | <i>Gallus gallus</i>           | NP_00100612                            | <i>Gallus gallus</i>          | Q91348, XP_414257, XP_417979, XP_416472                                                                                                    |
| <i>Rattus norvegicus</i>      | P05708, P27881, P27926, P17712                                                                     | <i>Rattus norvegicus</i>       | AAH62005                               | <i>Rattus norvegicus</i>      | P47858, Q9JJH5, P47860, P30835                                                                                                             |
| <i>Xenopus laevis</i>         | AAH72832, BQ734748, 2210326                                                                        | <i>Xenopus laevis</i>          | AAH73315                               | <i>Xenopus laevis</i>         | AAH70579, AAH84893, AAH70776,                                                                                                              |
| <i>Xenopus tropicalis</i>     | ENSXETP00000018649, ENSXETP00000019458, ENSXETP00000041217, ENSXETP00000042536                     | <i>Xenopus tropicalis</i>      | AAH90090                               | <i>Xenopus tropicalis</i>     | ENSXETP00000037288, ENSXETP00000039305, ENSXETP00000020639, ENSXETP00000047683                                                             |
| <i>Danio rerio</i>            | ENSDARP00000049485, ENSDARP00000024665                                                             | <i>Danio rerio</i>             | CAC83782, AAH44450                     | <i>Danio rerio</i>            | ENSDARP00000020245, ENSDARP00000036459, ENSDARP00000065761, ENSDARP00000020946                                                             |
| <i>Takifugu rubripes</i>      | SINFRUP00000130243, SINFRUP00000175342, SINFRUP00000171538, SINFRUP00000132593, SINFRUP00000154946 | <i>Mugil cephalus</i>          | CAC83778, CAC83779                     | <i>Takifugu rubripes</i>      | SINFRUP00000143959, SINFRUP00000154096, SINFRUP00000159206, SINFRUP00000162973, SINFRUP00000157362, SINFRUP00000166112, SINFRUP00000145680 |
| <i>Tetraodon nigroviridis</i> | GSTENP00031116001, GSTENP00029591001, GSTENP00025793001, GSTENP00004899001, GSTENP00025792001      | <i>Oncorhynchus mykiss</i>     | BX083050, BX075627                     | <i>Tetraodon nigroviridis</i> | GSTENP00006196001, GSTENP00013641001, GSTENP00027279001, GSTENP00023398001, GSTENP00013249001, GSTENP00023654001, GSTENP00013249001        |
| <i>C. elegans</i>             | F14B4.2a.1                                                                                         | <i>Oryzias latipes</i>         | sca751, sca4041                        | <i>C. elegans</i>             | Q27483                                                                                                                                     |
| <i>D. melanogaster</i>        | CG3001                                                                                             | <i>Takifugu rubripes</i>       | SINFRUP00000145974, SINFRUP00000159975 | <i>D.melanogaster</i>         | P52034                                                                                                                                     |
|                               |                                                                                                    | <i>Tetraodon nigroviridis</i>  | CAG01218, CAG14252                     | <i>Ciona intestinalis</i>     | ENSCINP00000010042                                                                                                                         |
|                               |                                                                                                    | <i>C. elegans</i>              | NP_493380.1                            |                               |                                                                                                                                            |
|                               |                                                                                                    | <i>D .melanogaster</i>         | CG8251                                 |                               |                                                                                                                                            |

**Supplementary material:** GenBank, JGI, ENSEMBL accession numbers of the amino acid sequences used for the phylogenetic analyses.

| Fructose-bisphosphate aldolase (FBA) |                                                            | Triosephosphate isomerase (TPI) |                               | Glyceraldehyde-3-phosphate dehydrogenase (GAPDH) |                                        |
|--------------------------------------|------------------------------------------------------------|---------------------------------|-------------------------------|--------------------------------------------------|----------------------------------------|
| <i>Homo sapiens</i>                  | AF054987, M11560, X02747                                   | <i>Homo sapiens</i>             | NM_000365                     | <i>Homo sapiens</i>                              | P04406, O14556                         |
| <i>Mus musculus</i>                  | BC008184, Y00516, BC036132                                 | <i>Mus musculus</i>             | NM_009415                     | <i>Mus musculus</i>                              | P00354                                 |
| <i>Gallus gallus</i>                 | BX929868, M10946                                           | <i>Gallus gallus</i>            | NM_205451                     | <i>Gallus gallus</i>                             | NP_032111, P16858                      |
| <i>Rattus norvegicus</i>             | M63656, M14420, M10149                                     | <i>Rattus norvegicus</i>        | NM_022922                     | <i>Rattus norvegicus</i>                         | NP_989636                              |
| <i>Xenopus laevis</i>                | AAB31152, BAA19524, AAH44676                               | <i>Xenopus laevis</i>           | BC046864                      | <i>Rattus norvegicus</i>                         | NP_076454, NP_058704                   |
| <i>Xenopus tropicalis</i>            | AAH67946, AAH74643, AAH61442                               | <i>Xenopus tropicalis</i>       | ENSXETP00000043527            | <i>Danio rerio</i>                               | ENSDARP00000049709, ENSDARP00000009462 |
| <i>Acipenser baerii</i>              | AB111405, AB111404, AB111403, DQ497981                     | <i>Danio rerio</i>              | AF387820, AF387819            | <i>Takifugu rubripes</i>                         | SINFRUP00000156120, SINFRUP00000142721 |
| <i>Cephaloscyllium umbrat.</i>       | BAD17931, BAD17932, BAD17933                               | <i>Oryzias latipes</i>          | AB183488, AB111387            | <i>Tetraodon nigroviridis</i>                    | GSTENP00035345001, GSTENP00015338001   |
| <i>Danio rerio</i>                   | BC053192, AY394966, AY394965, XP_707430, XP_690284         | <i>Takifugu rubripes</i>        | AL834781                      | <i>Crassostrea gigasgi</i>                       | CAD67717                               |
| <i>Lethen. camtschaticum</i>         | D38620, D38619                                             | <i>Tetraodon nigroviridis</i>   | CAA1007830, GSTENP00005289001 | <i>Schistosoma mansoni</i>                       | P20287                                 |
| <i>Polypterus ornatipinnis</i>       | BAD17924, BAD17925, BAD17926, DQ497983                     | <i>Xiphophorus maculatus</i>    | AAK85205, AAK85204            | <i>C. elegans</i>                                | K10B3.7.1, T09F3.3.1                   |
| <i>Potamotrygon motoro</i>           | BAD17938, BAD17939, BAD17940                               | <i>C. elegans</i>               | NM_064162                     | <i>D. melanogaster</i>                           | CG8893, P07486                         |
| <i>Takifugu rubripes</i>             | SINFRUP00000154393, SINFRUP00000144527, SINFRUP00000136751 | <i>D. melanogaster</i>          | NM_176589                     | <i>Ciona intestinalis</i>                        | ENSCINP00000005672                     |
| <i>Tetraodon nigroviridis</i>        | CAG0049, CAG0759, CAG0627, CAG0895                         | <i>Ciona intestinalis</i>       | ENSCINP00000013486            |                                                  |                                        |
| <i>Typhlonectes natans</i>           | DQ497982                                                   |                                 |                               |                                                  |                                        |
| <i>C. elegans</i>                    | NP_741281                                                  |                                 |                               |                                                  |                                        |
| <i>D. melanogaster</i>               | AAS65220                                                   |                                 |                               |                                                  |                                        |
| <i>Ciona intestinalis</i>            | Scf235                                                     |                                 |                               |                                                  |                                        |

**Supplementary material:** GenBank, JGI, ENSEMBL accession numbers of the amino acid sequences used for the phylogenetic analyses.

| Phosphoglycerate kinase (PGK) |                       | Phosphoglycerate mutase (PGAM) |                                                                                         | Enolase (ENO)                 |                                                                                         |
|-------------------------------|-----------------------|--------------------------------|-----------------------------------------------------------------------------------------|-------------------------------|-----------------------------------------------------------------------------------------|
| <i>Homo sapiens</i>           | Q8NI87,<br>NP_620061  | <i>Homo sapiens</i>            | NP_002620, NP_000281,<br>AAA51840                                                       | <i>Homo sapiens</i>           | P06733, P09104,<br>P13929                                                               |
| <i>Mus musculus</i>           | P09411,<br>AAH61054   | <i>Mus musculus</i>            | NP_075907, NP_061358<br>BAC31541                                                        | <i>Mus musculus</i>           | P21550, P17182,<br>P17183                                                               |
| <i>Gallus gallus</i>          | P51903                | <i>Gallus gallus</i>           | CAG31362, CAG32689                                                                      | <i>Gallus gallus</i>          | P51913, P07322,<br>P51913                                                               |
| <i>Rattus norvegicus</i>      | AAH6316,<br>XP_576525 | <i>Rattus norvegicus</i>       | NP_445742, NP_059024<br>AAH62240                                                        | <i>Rattus norvegicus</i>      | P04764, P07323,<br>P15429                                                               |
| <i>Equus caballus</i>         | P00559<br>Q8MIF       | <i>Xenopus laevis</i>          | AAH70630, AAH82455<br>AAH73185                                                          | <i>Xenopus laevis</i>         | AAH45082, CAA68706                                                                      |
| <i>Sus scrofa</i>             | Q7SIB7                | <i>Xenopus tropicalis</i>      | NP_001004858,<br>AAH74692, AAH67978                                                     | <i>Xenopus tropicalis</i>     | AAH96516, AAH61287                                                                      |
| <i>Bos taurus</i>             | XP_581328             | <i>Danio rerio</i>             | ENSDART00000016350,<br>ENSDART00000008287,<br>NP_957318,<br>NP_001002630                | <i>Acipenser baerii</i>       | DQ497984, DQ497987                                                                      |
| <i>Macropus eugenii</i>       | P29408                |                                |                                                                                         | <i>Danio rerio</i>            | AAH59434, AAM88901,<br>AAH72713, AAQ97775                                               |
| <i>Xenopus laevis</i>         | AAH43781              |                                |                                                                                         | <i>Eptatretus burgeri</i>     | BAA88479                                                                                |
| <i>Xenopus tropicalis</i>     | CR760747              | <i>Takifugu rubripes</i>       | SINFRUP00000143399,<br>SINFRUP00000144165,<br>SINFRUP00000168929,<br>SINFRUP00000139469 | <i>Lethenteron reissneri</i>  | BAA88483, BAA88482                                                                      |
| <i>Rana sylvatica</i>         | Q9DG72                |                                |                                                                                         | <i>Polypterus senegalus</i>   | DQ497985, DQ497988                                                                      |
| <i>Danio rerio</i>            | AAH65888              | <i>Tetraodon nigroviridis</i>  | GSTENP00029715001,<br>GSTENP00016506001,<br>GSTENP00026289001,<br>GSTENP00011651001     | <i>Takifugu rubripes</i>      | SINFRUP00000150208,<br>SINFRUP00000131536,<br>SINFRUP00000156170,<br>SINFRUP00000169571 |
| <i>Oryzias latipes</i>        | BAD17900              |                                |                                                                                         | <i>Tetraodon nigroviridis</i> | CAF8980, CAF9382,<br>CAG0691, CAF9063                                                   |
| <i>Takifugu rubripes</i>      | SINFRUP00000160355    | <i>C. elegans</i>              | NP_492409                                                                               | <i>Typhlonectes natans</i>    | DQ497986, DQ497989                                                                      |
| <i>Tetraodon nigroviridis</i> | GSTENP00014631001     | <i>D. melanogaster</i>         | NP_524546                                                                               | <i>C. elegans</i>             | NP_001022349                                                                            |
| <i>Lepisosteus osseus</i>     | BAD17907              | <i>Ciona intestinalis</i>      | ENSCINP00000016603                                                                      | <i>D. melanogaster</i>        | EAL33991                                                                                |
| <i>Acipenser baerii</i>       | BAD17922              |                                |                                                                                         | <i>Ciona intestinalis</i>     | ENSCINP00000015064                                                                      |
| <i>Ciona intestinalis</i>     | ENSCINP00000004571    |                                |                                                                                         |                               |                                                                                         |
| <i>C. elegans</i>             | NP_491245             |                                |                                                                                         |                               |                                                                                         |
| <i>D. melanogaster</i>        | CG3127                |                                |                                                                                         |                               |                                                                                         |

**Supplementary material:** GenBank, JGI, ENSEMBL accession numbers of the amino acid sequences used for the phylogenetic analyses.

---

| <b>Pyruvate kinase (PK)</b>   |                                                                   |
|-------------------------------|-------------------------------------------------------------------|
| <i>Homo sapiens</i>           | NP_000289, NP_872270                                              |
| <i>Mus musculus</i>           | ENSMUSP00000034834,<br>ENSMUSP00000035417                         |
| <i>Gallus gallus</i>          | P00548                                                            |
| <i>Rattus norvegicus</i>      | ENSRNOP00000015398,<br>ENSRNOP00000027700                         |
| <i>Xenopus laevis</i>         | Q92122, AAH60485                                                  |
| <i>Xenopus tropicalis</i>     | ENSXETP00000011367,<br>ENSXETP00000028820                         |
| <i>Danio rerio</i>            | ENSDARP00000006300,<br>ENSDARP00000017190,<br>ENSDARP000000061565 |
| <i>Takifugu rubripes</i>      | SINFRUP00000128238,<br>SINFRUP00000129186,<br>SINFRUP00000141035  |
| <i>Tetraodon nigroviridis</i> | GSTENP00012066001,<br>GSTENP00015375001,<br>GSTENP00025632001     |
| <i>C. elegans</i>             | NP_492458                                                         |
| <i>D. melanogaster</i>        | O62619                                                            |
| <i>Ciona intestinalis</i>     | ENSCINP00000008552                                                |

---
